# Supplementary material for: Marrubium alysson L. Ameliorated Methotrexate-Induced Testicular Damage in Mice through Regulation of Apoptosis and miRNA-29a Expression: LC-MS/MS Metabolic Profiling
Source: MDPI journal article supplement (doi:10.3390/plants11172309), 2022-09-03
Supplement: s1 [file s1]

# *Marrubium alysson* L. Ameliorated Methotrexate-Induced Testicular Damage in Mice through Regulation of Apoptosis and miRNA-29a Expression: LC-MS/MS Metabolic Profiling

## Additional Experimental Detail

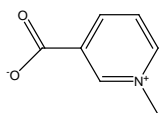

Trigonelline

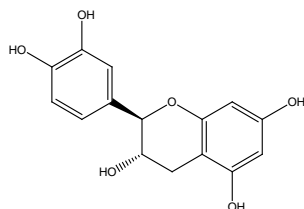

Catechin

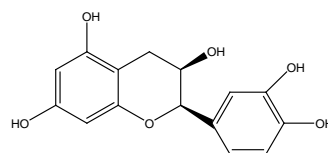

(-)-Epicatechin

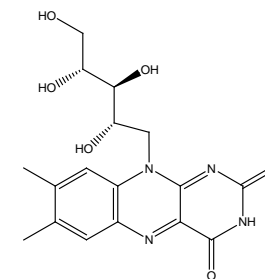

(-)-Riboflavin

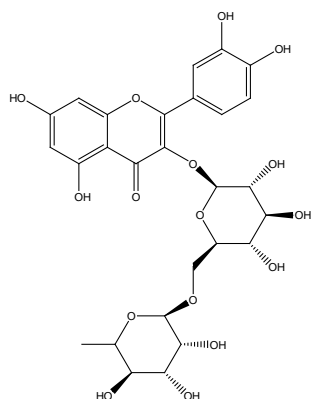

Rutin

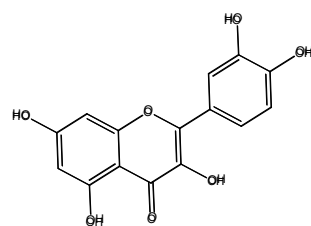

Quercetin

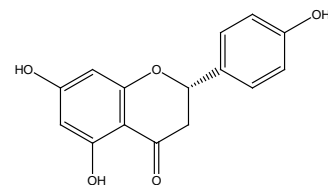

Naringenin

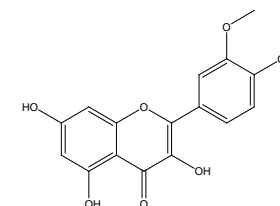

Isorhamnetin

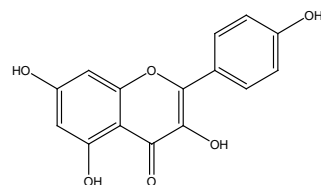

Kaempferol

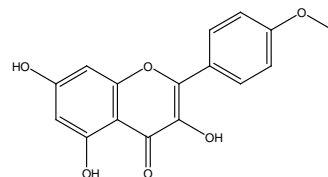

Diosmetin

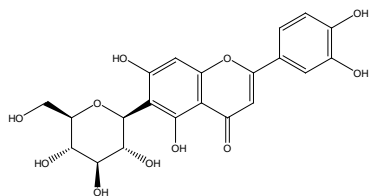

**Isoorientin**

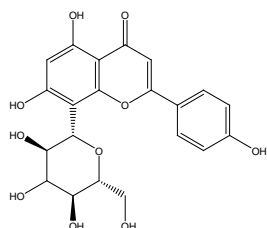

**Apigenin 8-C-glucoside**

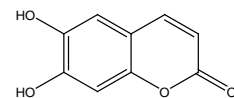

**6,7-dihydroxycoumarin  
(Aesculetin)**

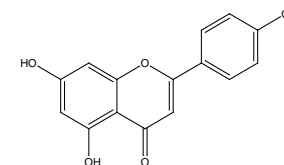

**Apigenin**

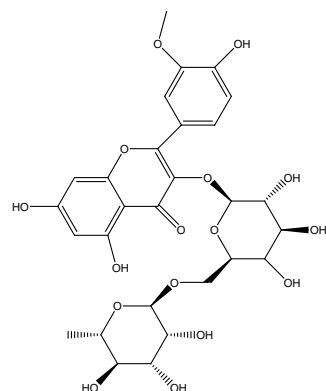

**Isorhamnetin-3-O-rutinoside**

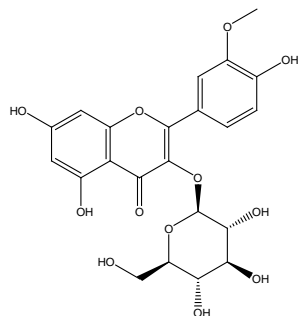

**Isorhamnetin-3-O-glucoside**

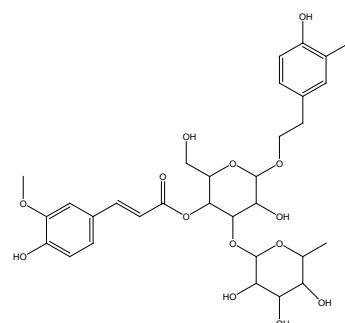

**Leucosceptoside A**

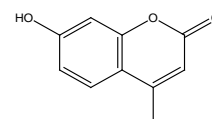

**7-hydroxy-4-methylcoumarin**

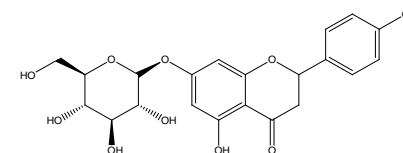

**Naringenin-7-O-glucoside**

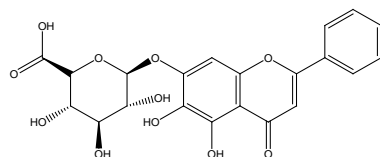

**Baicalein-7-O-glucuronide**

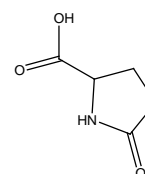

**L-5-Oxoproline**

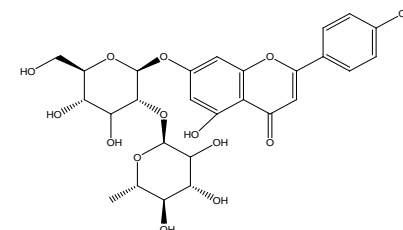

**Apigenin 7-O-neohesperidoside**

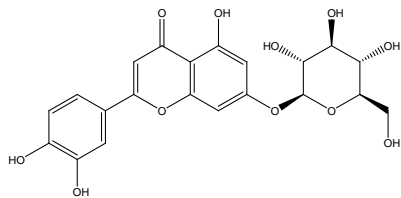

**Luteolin-7-O-glucoside**

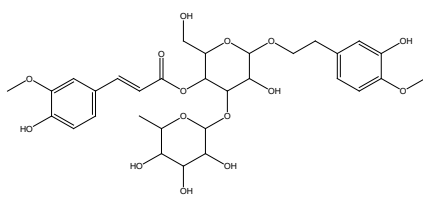

**Martynoside**

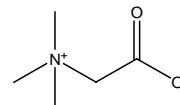

**Glycine-Betaine**

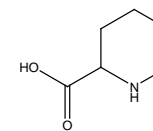

**Pipecolate**

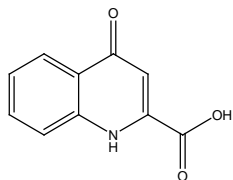

**Kynurenic acid**

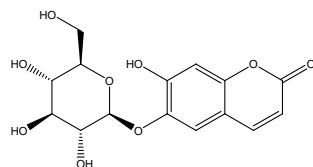

**Esculin**

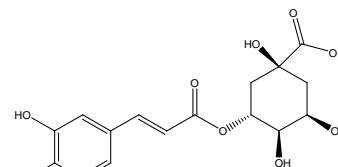

**Chlorogenic acid**

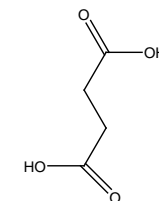

**Succinic acid**

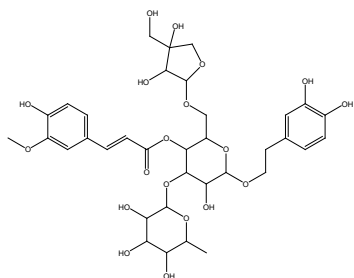

**Alyssonoside**

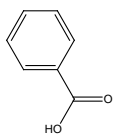

**Benzoic acid**

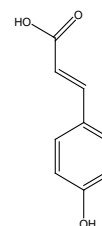

**3-(4-hydroxyphenyl)prop-2-enoic acid**

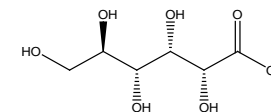

**Gluconate**

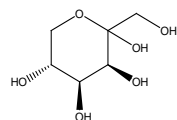

**D-(-)-Tagatose**

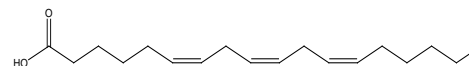

**gamma-Linolenic acid**

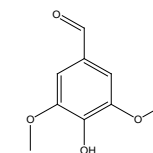

**Syringaldehyde**

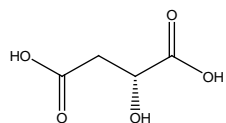

**D-(+)-Malic acid**

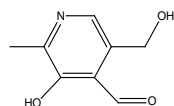

**Pyridoxal**

**Figure S1.** Chemical structures of the identified compounds in methanolic extract of *M. alysson* L.

**Table S1.** Primer sequences and annealing temperatures for the measured genes by real time PCR.

|           | Forward Primer                   | Reverse Primer                | Annealing Temperature |
|-----------|----------------------------------|-------------------------------|-----------------------|
| NF-κb     | 5'-CAATGGCTACACAGGACCA-3'        | 5'-CACTGTCACCTGGAACCAGA-3'    | 52° C                 |
| TNF-α     | 5'-TCTACTGAACTTCGGGGTGATCG-3'    | 5'-TGATCTGAGTGTGAGGGTCTGGG-3' | 56° C                 |
| p53       | 5'-ACCGCCGACCTATCCTTACC-3'       | 5'-TCTTCTGTACGGCGGTCTCTC-3'   | 56° C                 |
| β-actin   | 5'-ACGGCCAGGTCATCACTATTG-3'      | 5'-CAAGAAGGAAGGCTGGAAAAGA-3'  | 52° C                 |
| miRNA-29a | 5'-GCGCACTGATTTCTTTGGTGTTTCAG-3' | 5'-GCGAGCACAGAATTAATACGAC-3'  | 51° C                 |
| RNU6B     | 5'-CTCGCTTCGGCAGCACATA-3'        | 5'-CGCTTCACGAATTTGCGTG-3'     | 53° C                 |
